# Supplementary material for: Boosting test-efficiency by pooled testing for SARS-CoV-2—Formula for optimal pool size
Source: PubMed Central journal article supplement (PMC7641378; doi:10.1371/journal.pone.0240652), 2020-11-04
Supplement: pone.0240652.s001.pdf [file pone.0240652.s001.pdf]

# S1 File

## Boosting test-efficiency by pooled testing for SARS-CoV-2 – formula for optimal pool size”

Rudolf Hanel<sup>1,2</sup>, Stefan Thurner<sup>1,2,3,4</sup>,

**1** Section for Science of Complex Systems, Medical University of Vienna, Spitalgasse 23, 1090 Vienna, Austria **2** Complexity Science Hub Vienna, Josefstädterstrasse 39, 1080 Vienna, Austria **3** Santa Fe Institute, 1399 Hyde Park Road, Santa Fe, NM 87501, USA **4** IIASA, Schlossplatz 1, 2361 Laxenburg, Austria

\* To whom correspondence should be addressed. E-mail: stefan.thurner@muw.ac.at

## SI1 Derivation of optimal group size

We recall that the probability of a randomly sampled group of  $\omega$  individuals to have at least one infected in the group is given by  $p = 1 - (1 - \lambda)^\omega$ , where  $\lambda$  is the disease prevalence, i.e. the fraction of infected in the general or considered population. Also, the number of persons per test  $PPT$  is given by  $1/Q$ , where the expected numbers of tests per person,  $Q$ , is given in Eq. (5) of the main document, and therefore we get

$$PPT = \frac{1}{P_+^* + \frac{r}{\omega}}, \quad (\text{SI1.1})$$

where  $P_+^* = p(1 - \gamma_+^* - \gamma_-^*) + \gamma_+^*$  (compare main document Eq. (4)).  $\gamma_+^*$  and  $\gamma_-^*$  are the effective false negative and false positive rates of pooled tests with multiple replicates, given in Eq. (2) and Eq. (3) of the main document. We note that neither  $\gamma_+^*$  nor  $\gamma_-^*$  depend on  $\omega$  and we can compute

$$\frac{d}{d\omega} PPT = -PPT^2 \left( -\log(1 - \lambda)(1 - \lambda)^\omega (1 - \gamma_+^* - \gamma_-^*) - \frac{r}{\omega^2} \right). \quad (\text{SI1.2})$$

For obtaining the extremal  $\omega$ , we have to solve  $\frac{d}{d\omega} PPT = 0$ . This implies

$$\omega^2 e^{\log(1-\lambda)\omega} = \frac{r}{(1 - \gamma_+^* - \gamma_-^*) \log\left(\frac{1}{1-\lambda}\right)}, \quad (\text{SI1.3})$$

and further,

$$\frac{1}{2} \log(1 - \lambda) \omega e^{\frac{1}{2} \log(1-\lambda)\omega} = \frac{1}{2} \log(1 - \lambda) \left( \frac{r}{(1 - \gamma_+^* - \gamma_-^*) \log\left(\frac{1}{1-\lambda}\right)} \right)^{\frac{1}{2}}. \quad (\text{SI1.4})$$

As a consequence we obtain

$$\omega^{\text{opt}} = \frac{W_0 \left( \frac{1}{2} \log(1 - \lambda) \left( \frac{r}{(1 - \gamma_+^* - \gamma_-^*) \log\left(\frac{1}{1-\lambda}\right)} \right)^{\frac{1}{2}} \right)}{\frac{1}{2} \log(1 - \lambda)}, \quad (\text{SI1.5})$$

where  $W_0$  is the principal branch of the Lambert-W function. For small  $\lambda$ , using that  $\log(1/(1-\lambda)) \sim \lambda$ , and that  $W_0(x) \sim x$  for  $|x| \ll 1$ , this approximately yields

$$\omega^{\text{opt}} \sim \left( \frac{r}{(1 - \gamma_+^* - \gamma_-^*)\lambda} \right)^{\frac{1}{2}}. \quad (\text{SI1.6})$$

## SI2 Majority rules and dependency on numbers of replicates

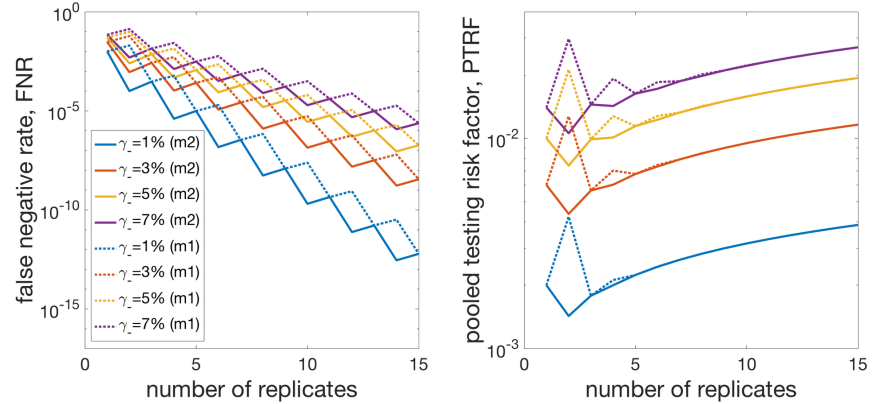

**Fig SI2.1. Majority rule type and replicates.** (A) *False negative rate* (FNR) are displayed for majority rule (m1) in dotted lines and (m2) in full lines, for false negative rates of  $\gamma_- = 0.01, 0.03, 0.05,$  and  $0.07$ . (B) *Pooled testing risk factor* (PTRF) are also displayed for majority rule (m1) in dotted lines and (m2) in full lines, for false negative rates of  $\gamma_- = 0.01, 0.03, 0.05,$  and  $0.07$ .

In Fig. SI2.1 we see that both, the *false negative rate*, FNR, of pooled tests with multiple replicates, which is not group size dependent, and the respective *pooled testing risk factor*, PTRF, given at the optimal group size behave differently in the sense that over all we can observe that FNR decreases (compare Fig. SI2.1A) with growing numbers of replicates while PTRF increases (compare Fig. SI2.1B). However, FNR is not decreasing strictly monotonically. For majority rule m1, that a group is considered positive if there more replicate tests have registered positive than negative, all even numbers,  $2n$ , of replicates yield higher FNR than for the adjacent odd numbers of replicates  $2n + 1$  and  $2n - 1$ . For majority rule m2, that a group is considered positive if there are at least as many replicate tests that have registered positive as replicates that have registered negative, the situation is reversed. All even numbers,  $2n$ , of replicates yield a lower FNR than respective tests with odd numbers of replicates  $2n + 1$  and  $2n - 1$ . Similarly, for the *pooled testing risk factor*, PTRF, tests with even numbers of replicates also yield consistently lower PTRF values for rule m2 than rule m1 (compare Fig. SI2.1B). However, the gain in PTRF is most pronounced for two replicates, while for numbers of replicates larger than 5, there remains hardly any observable difference between the two versions of the majority rule. As a consequence we can safely conclude that rule m2 is consistently superior to rule m1 with respect to controlling false negative rates related measures such as FNR and PTRF.

## SI3 Matlab Code: single\_stage\_group\_test.m

Here we provide the code for a Matlab function (single\_stage\_group\_test.m), which can be used to reproduce all results and plots produced in the main paper. The input variables are explained in the header of the m-file. The functions output is a Matlab struct out with items

- out.PPT ... *persons per test* values given as a  $N_r \times \Omega_{max}$ -matrix for  $N_r$  numbers of replicates (e.g. setting variable  $Rv = [1, 2, 3, 4, 5]$  means  $N_r = 5$ )
- out.PTRF ... *pooled testing risk factor* also a  $N_r \times \Omega_{max}$ -matrix
- out.oPPT ... PPT values; vector of length  $N_r$  holding the values of PPT for the optimal group sizes provided in the input variable  $Rv$  .
- out.oPTRF ... PTRF values; vector of length  $N_r$  holding the values of PTRF for the optimal group sizes with respect to the numbers of replicates provided in the input variable  $Rv$  .

```
1 %%%%%%%%%%%%%%%%%%%%%%%%%%%%%%%%%%%%%%%%%%%%%%%%%%%%%%%%%%%%%%%%%%%%%%%%%%
2 % variables:
3 %%%%%%%%%%%%%%%%%%%%%%%%%%%%%%%%%%%%%%%%%%%%%%%%%%%%%%%%%%%%%%%%%%%%%%%%%%
4 % fposv ... (1) the const false positive rate
5 %           (template 0.014) or
6 %           (2) [fpos1, fpos2] fpos will be
7 %           linearly interpolated between
8 %           omega=1 (fpos1) and poolsize_max (fpos2)
9 % fnegv ... (1) the const false negative rate
10 %          (template 0.02) or
11 %          (2) [fneg1, fneg2] fneg will be
12 %          linearly interpolated between
13 %          omega=1 (fneg1) and poolsize_max (fneg2)
14 % poolsize_max ... the maximally considered pool
15 %                 size (template value 100)
16 % lambda ... the infection level (disease prevalence)
17 %            as the fraction of the infected
18 %            population (not percent!!!)
19 % Rv ...      number of replicas (can be a vector)
20 % is_m2 ...  if true -> majority rule m2: multiple
21 %            replicas are positive if at least as
22 %            many positives as negatives
23 %            if false -> majority rule m1: more
24 %            replicas need to be positive than negative
25 %            for the replicated pooled test to be positive
26 % plotflg ... if true the out put variable (PPT, PTRF)
27 %            get plotted into a new figure
28 %%%%%%%%%%%%%%%%%%%%%%%%%%%%%%%%%%%%%%%%%%%%%%%%%%%%%%%%%%%%%%%%%%%%%%%%%%
29 function out = single_stage_group_test(fposv,fnegv, poolsize_max
30                                     ,lambda,Rv,is_m2, plotflg);
31 % templates and variable handling
32 if length(fposv)==0,
33     fposv=0.014;
34 end;
```

```

35 if length(fnegv)==0,
36     fposv=0.02;
37 end;
38 if length(fposv)==1;
39     fposv=[fposv fposv];
40 end;
41 if length(fnegv)==1;
42     fnegv=[fnegv fnegv];
43 end;
44 if length(poolsize_max)==0,
45     poolsize_max=100;
46 end;
47 if length(lambda)==0,
48     lambda=0.01;
49 end;
50 if length(is_m2)==0,
51     is_m2=true;
52 end;
53 if length(plotflg)==0,
54     plotflg=true;
55 end;
56 %%%%%%%%%%%%%%%%%%%%%%%%%%%%%%%%%%%%%%%%%%%%%%%%%%%%%%%%%%%%%%%%%%%%%%%%%
57 % remember variables
58 isgeq=is_m2;
59 out.poolsize_max=poolsize_max;
60 out.lambda=lambda;
61 out.R=Rv;
62 out.is_m2=isgeq;
63 out.is_m1=~(isgeq);
64 out.fpos=fposv;
65 out.fneg=fnegv;
66 %%%%%%%%%%%%%%%%%%%%%%%%%%%%%%%%%%%%%%%%%%%%%%%%%%%%%%%%%%%%%%%%%%%%%%%%%
67 % compute ...
68 %%%%%%%%%%%%%%%%%%%%%%%%%%%%%%%%%%%%%%%%%%%%%%%%%%%%%%%%%%%%%%%%%%%%%%%%%
69 NR=length(Rv);
70 %%%%%%%%%%%%%%%%%%%%%%%%%%%%%%%%%%%%%%%%%%%%%%%%%%%%%%%%%%%%%%%%%%%%%%%%%
71 % const for linear increasing fn with poolsize
72 fpnv=0:(poolsize_max-1);
73 %%%%%%%%%%%%%%%%%%%%%%%%%%%%%%%%%%%%%%%%%%%%%%%%%%%%%%%%%%%%%%%%%%%%%%%%%
74 fpos1=fposv(1);
75 fposfac=fposv(2)/fposv(1);
76 fpinc=(fposfac-1)/(poolsize_max-1);
77 fpfacv=1+fpnv*fpinc;
78
79 fneg1=fnegv(1);
80 fnegfac=fnegv(2)/fnegv(1);
81 fninc=(fnegfac-1)/(poolsize_max-1);
82 fnfacv=1+fpnv*fninc;
83 %%%%%%%%%%%%%%%%%%%%%%%%%%%%%%%%%%%%%%%%%%%%%%%%%%%%%%%%%%%%%%%%%%%%%%%%%
84 % lambda ... probability to have an infected person in
85 %           a population of N
86 %%%%%%%%%%%%%%%%%%%%%%%%%%%%%%%%%%%%%%%%%%%%%%%%%%%%%%%%%%%%%%%%%%%%%%%%%

```

```

87 %%%%%%%%%%%%%%%%%%%%%%%%%%%%%%%%%%%%%%%%%%%%%%%%%%%%%%%%%%%%%%%%%%%%%%%%%%
88 % constants ...
89 %%%%%%%%%%%%%%%%%%%%%%%%%%%%%%%%%%%%%%%%%%%%%%%%%%%%%%%%%%%%%%%%%%%%%%%%%%
90 % for switching from greater or equal than to greater than
91 % depending on the majority protocol (0<eps<1)
92 eps=0.1;
93 %%%%%%%%%%%%%%%%%%%%%%%%%%%%%%%%%%%%%%%%%%%%%%%%%%%%%%%%%%%%%%%%%%%%%%%%%%
94 %%%%%%%%%%%%%%%%%%%%%%%%%%%%%%%%%%%%%%%%%%%%%%%%%%%%%%%%%%%%%%%%%%%%%%%%%%
95 % expected number of persons per test (PPT)
96 out.PPT=zeros(NR, poolsize_max);
97 % expected maximal number of missed positive individuals (PTRF)
98 out.PTRF=zeros(NR, poolsize_max);
99 % optimal group size
100 out.oGS=zeros(NR);
101 % values at optimal group size
102 out.oPPT=zeros(NR);
103 out.oPTRF=zeros(NR);
104 %%%%%%%%%%%%%%%%%%%%%%%%%%%%%%%%%%%%%%%%%%%%%%%%%%%%%%%%%%%%%%%%%%%%%%%%%%
105 %%%%%%%%%%%%%%%%%%%%%%%%%%%%%%%%%%%%%%%%%%%%%%%%%%%%%%%%%%%%%%%%%%%%%%%%%%
106 % loop over pool size
107 for omega=1:poolsize_max ,
108     fpos=fpos1*fpfacv(omega);
109     fneg=fneg1*fnfacv(omega);
110     %%%%%%%%%%%%%%%%%%%%%%%%%%%%%%%%%%%%%%%%%%%%%%%%%%%%%%%%%%%%%%%%%%%%%%%%%%
111     % loop over replicates
112     for rid=1:NR,
113         R=Rv(rid);
114         %%%%%%%%%%%%%%%%%%%%%%%%%%%%%%%%%%%%%%%%%%%%%%%%%%%%%%%%%%%%%%%%%%%%%%%%%%
115         % switch from greater or equal than to greater than
116         % depending on the majority protocol
117         if isgeq ,
118             peps=0;
119             neps=eps;
120         else
121             peps=eps;
122             neps=0;
123         end;
124         %%%%%%%%%%%%%%%%%%%%%%%%%%%%%%%%%%%%%%%%%%%%%%%%%%%%%%%%%%%%%%%%%%%%%%%%%%
125         % probability that at least one individual in the pool
126         % is positive
127         ppos=(1-(1-lambda)^omega);
128         %%%%%%%%%%%%%%%%%%%%%%%%%%%%%%%%%%%%%%%%%%%%%%%%%%%%%%%%%%%%%%%%%%%%%%%%%%
129         % compute the false positive and false negative rate
130         % for replica
131         % the probability that the majority (m1 or m2 depending
132         % on geq)
133         % of R tests is falsly positive
134         fpeff=0;
135         for n=ceil((R+peps)/2):R,
136             fpeff=fpeff+nchoosek(R,n)*(fpos^n)*((1-fpos)^(R-n))
137             ;
138         end;

```

```

135     % the probability that we miss a positive groupe
136     fneff=0;
137     for n=ceil((R+neps)/2):R,
138         fneff=fneff+nchoosek(R,n)*(fneg^n)*((1-fneg)^(R-n))
139         ;
140     end;
141     %%%%%%%%%%%%%%%%%%%%%%%%%%%%%%%%%%%%%%%%%%%%%%%%%%%%%%%%%%%
142     % prob of positive pool
143     ppp=ppos*(1-fpeff-fneff)+fpeff;
144     %%%%%%%%%%%%%%%%%%%%%%%%%%%%%%%%%%%%%%%%%%%%%%%%%%%%%%%%%%%
145     R_id=rid;
146     if (omega>=R),
147         out.PPT(R_id,omega)=1./(ppp+R/omega);
148         out.PTRF(R_id,omega)=ppos*(fneff+(1-fneff)*fneg);
149     else
150         out.PPT(R_id,omega)=NaN;
151         out.PTRF(R_id,omega)=NaN;
152     end;
153     %%%%%%%%%%%%%%%%%%%%%%%%%%%%%%%%%%%%%%%%%%%%%%%%%%%%%%%%%%%
154 end;
155 %%%%%%%%%%%%%%%%%%%%%%%%%%%%%%%%%%%%%%%%%%%%%%%%%%%%%%%%%%%
156 %%%%%%%%%%%%%%%%%%%%%%%%%%%%%%%%%%%%%%%%%%%%%%%%%%%%%%%%%%%
157 for rid2=1:NR,
158     v=find(out.PPT(rid2,:)==max(out.PPT(rid2,:)));
159     xid=min(100,v(1));
160     if (lambda>0.01 && xid==100),
161         out.oGS(rid2)=NaN;
162         out.oPPT(rid2)=NaN;
163         out.oPTRF(rid2)=NaN;
164     else
165         out.oGS(rid2)=xid;
166         out.oPPT(rid2)=out.PPT(rid2,xid);
167         out.oPTRF(rid2)=out.PTRF(rid2,xid);
168     end;
169 end;
170 %%%%%%%%%%%%%%%%%%%%%%%%%%%%%%%%%%%%%%%%%%%%%%%%%%%%%%%%%%%
171 %%%%%%%%%%%%%%%%%%%%%%%%%%%%%%%%%%%%%%%%%%%%%%%%%%%%%%%%%%%
172
173 if plotflg,
174     figure;
175     FS=26;
176     subplot(1,3,1);
177     h1=plot(out.PPT','LineWidth',3);
178     ax = gca;
179     ax.FontSize = 24;
180     xlabel('pool size , \omega', 'FontSize',FS);
181     ylabel('PPT', 'FontSize',FS);
182     subplot(1,3,2);
183     h2=plot(out.PTRF','LineWidth',3);,
184     %axis([0 100 0 1])
185     ax = gca;

```

```

186     ax.FontSize = 24;
187     xlabel('pool size, \omega', 'FontSize',FS);
188     ylabel('PTRF', 'FontSize',FS);
189     subplot(1,3,3);
190 %     h3=plot(out.PPT',out.PTRF', 'LineWidth', 3);,
191     h3=plot(out.PTRF',out.PPT', 'LineWidth', 3);,
192     %axis([0 100 0 1])
193     ax = gca;
194     ax.FontSize = 24;
195     ylabel('PPT', 'FontSize',FS);
196     xlabel('PTRF', 'FontSize',FS);
197 end;
198
199 %%%%%%%%%%%%%%%%%%%%%%%%%%%%%%%%%%%%%%%%%%%%%%%%%%%%%%%%%%%%%%%%%%%%%%%%%%%
200 % END
201 %%%%%%%%%%%%%%%%%%%%%%%%%%%%%%%%%%%%%%%%%%%%%%%%%%%%%%%%%%%%%%%%%%%%%%%%%%%

```

## SI4 Matlab files

In the zipped SI file we also provide the following m-files. Three scripts that we used for producing the three figures in the main document and the figure in SI2. For convenience, we also provide the code above as a Matlab function file.

- single\_stage\_group\_testing\_fig1.m (script)
- single\_stage\_group\_testing\_fig2.m (script)
- single\_stage\_group\_testing\_fig3.m (script)
- single\_stage\_group\_testing\_figSI1.m (script)
- single\_stage\_group\_test.m (the function printed above)
